# Supplementary material for: Phylogeographic investigation and ecological niche modelling of the endemic frog species Nanorana pleskei revealed multiple refugia in the eastern Tibetan Plateau
Source: PeerJ. 2017 Sep 11;5:e3770. doi: 10.7717/peerj.3770 (PMC5598431; doi:10.7717/peerj.3770)
Supplement: Supplemental Information 1 [file peerj-05-3770-s001.xlsx]

## Sheet: Sample
Population no.	Locality no.	ID	Locality, County, Province	Latitude	Longitude	Altitude (m.a.s.l)	n	mtDNA haplotype (n)	Hd (s.d.)	π
1	1	GES	Gaoersi, Kangding, Sichuan	30.045	101.377	4210	18	H1 (1), H2 (14), H4 (1), H5 (2)	0.399 (0.019)	0.000413774
2	2	GGS	Gonggashan, Kangding, Sichuan	29.468	101.535	3620	10	H2 (2), H3 (3), H5 (5)	0.689 (0.011)	0.00101924
3	3	JGB	Jiagenba, Kangding, Sichuan	29.847	101.56	3430	9	H3 (9)	0	0
4	4	MGC	Mugecuo, Kangding, Sichuan	30.183	101.862	3850	20	H5 (20)	0	0
5	5	ZDS	Zheduoshan, Kangding, Sichuan	30.062	101.754	3904	15	H5 (15)	0	0
6	6	PX	Puxiong, Yuexi, Sichuan	28.522	102.731	3240	6	H5 (6)	0	0
7	7	TG	Tanggu, Jiulong, Sichuan	29.158	101.398	3703	9	H5 (7), H6 (1), H7 (1)	0.583 (0.034)	0.000430663
8	8	Sqa	Site a, Shiqu, Sichuan	32.515	98.387	4336	17	H8 (1), H9 (1), H10 (1), H11 (14)	0.331 (0.020)	0.000227998
9	9	SQb	Site b, Shiqu, Sichuan	33.129	97.771	4209	16	H10 (2), H11 (14)	0.233 (0.016)	0.000150732
10	10	HY	Hongyuan plateau, Hongyuan, Sichuan	32.91	102.699	3615	9	H12 (1), H13 (1), H14 (1), H15 (3), H16 (1), H17 (1), H18 (1)	0.917 (0.092)	0.00132788
11	11	ZOI	Zoige plateau, Zoige, Sichuan	33.713	102.494	3504	11	H14 (8), H19 (3)	0.436 (0.018)	0.000563777
12	12	JZ	Jiuzhi plateau, Jiuzhi, Qinghai	33.264	101.499	3791	20	H13 (1), H14 (3), H16 (10), H20 (5), H21 (1)	0.695 (0.007)	0.000985992
13	13	SP	Sandagu, Songpan, Sichuan	32.908	103.525	3248	5	H14 (4), H22 (1)	0.400 (0.237)	0.000258398
14	14	Aba	Site a, Aba, Sichuan	32.935	101.649	3354	9	H16 (6), H17 (1), H23 (2)	0.566 (0.027)	0.000897215
15	15	Abb	Site b, Aba, Sichuan	32.738	101.662	3522	14	H14 (2), H16 (11), H21 (1)	0.385 (0.022)	0.00043303
