# Supplementary material for: Phylogeographic investigation and ecological niche modelling of the endemic frog species Nanorana pleskei revealed multiple refugia in the eastern Tibetan Plateau
Source: PeerJ. 2017 Sep 11;5:e3770. doi: 10.7717/peerj.3770 (PMC5598431; doi:10.7717/peerj.3770)
Supplement: Supplemental Information 2 [file peerj-05-3770-s002.xlsx]

## Sheet: Sheet1
Gene	Length	Primer name	Primer sequence
CO1	963 bps	NPCO1F1	5’-TCGGGCCGAGCTAAGCCAAC-3’
		NPCO1R1	5’-AACCCGGCCATGATTGCGAA-3’
ND1	585 bps	NPND1F1	5’-CCGCCCCTCGACATCGTCAC-3’
		NPND1R1	5’-ATCGGGGGTAGGAAGCGCGG-3’
